# Supplementary material for: Tunable near-infrared fluorescent gold nanoclusters: temperature sensor and targeted bioimaging
Source: Royal Society of Chemistry journal article supplement (doi:10.1039/c7nj00175d), 2017-01-01
Supplement: c7nj00175d1.pdf [file c7nj00175d1.pdf]

**Supporting Information**

**Tunable Near-Infrared Fluorescent Gold Nanoclusters:  
Temperature Sensor and Targeted Bioimaging**

Yuanqing Sun,<sup>a</sup> Jiapeng Wu,<sup>c</sup> Chuanxi Wang,<sup>\*b,c</sup> Yueqi Zhao<sup>a</sup> and Quan Lin<sup>\*a</sup>

<sup>a</sup> State Key Laboratory of Supramolecular Structure and Materials, College of Chemistry, Jilin University, Changchun, 130012, P. R. China

<sup>b</sup> Institute of New Energy Technology, Ningbo Institute of Industrial Technology, Chinese Academy of Sciences, Ningbo, 315201, P. R. China

<sup>c</sup> China-Australia Joint Research Centre for Functional Molecular Materials, School of Chemical & Material Engineering, Jiangnan University, Wuxi, 214122, P. R. China

Corresponding author E-mail Address: [linquan@jlu.edu.cn](mailto:linquan@jlu.edu.cn)

[wangcx@nimte.ac.cn](mailto:wangcx@nimte.ac.cn)

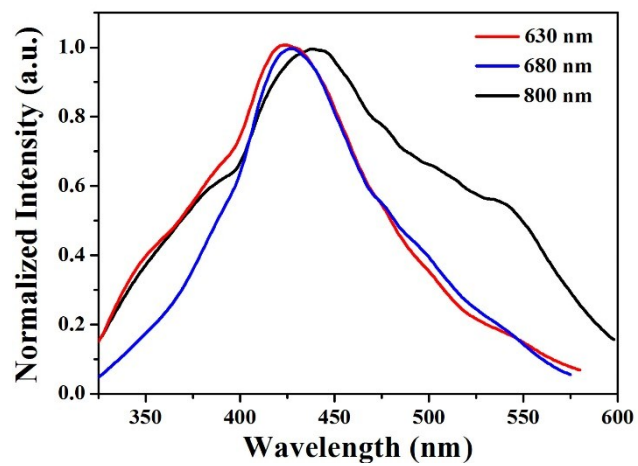

**Fig. S1.** Fluorescence excitation spectra of GSH-AuNCs with various emission wavelength: 630 nm (red line); 680 nm (blue line); 800 nm (black line).

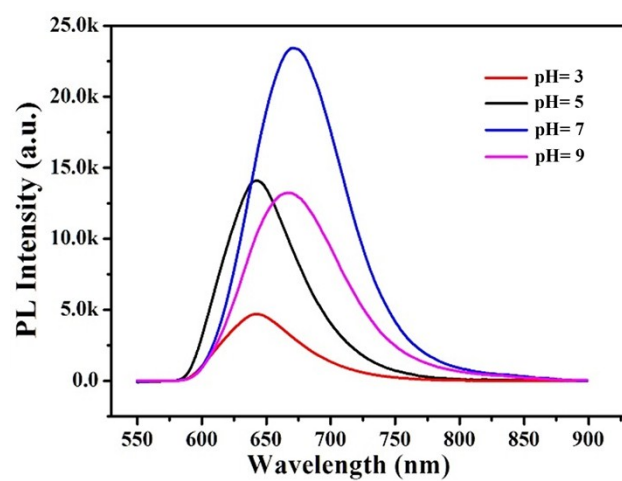

**Fig. S2.** Fluorescent spectra of resultant GSH-AuNCs prepared by various pH values.

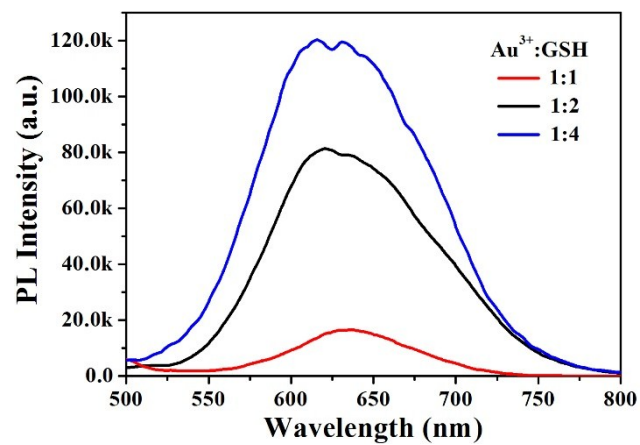

**Fig. S3.** Fluorescence spectrum of GSH-AuNCs with various mole ratio of Au<sup>3+</sup>/GSH: 1:1 (red line), 1:2 (black line) and 1:4 (blue line).

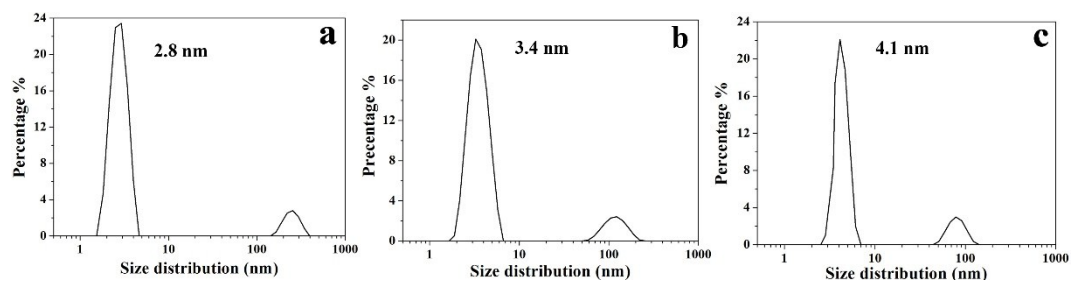

**Fig. S4.** DLS data of GSH-AuNCs with various emission wavelengths: a, 630 nm; b, 680 nm; c, 800 nm.

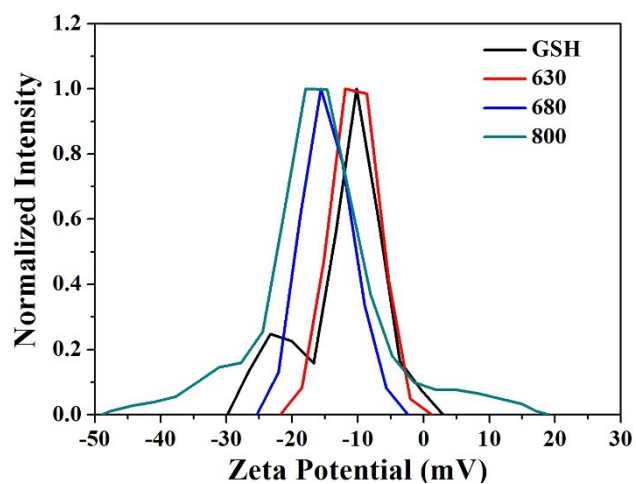

**Fig. S5.** Zeta potentials of pure GSH (black line) and GSH-AuNCs with various emission wavelengths: 630 nm (red line), 680 nm (blue line) and 800 nm (green line).

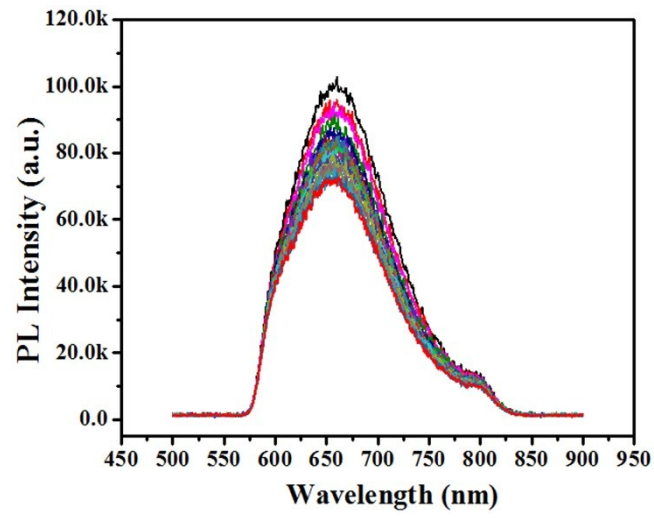

**Fig. S6.** Fluorescence spectra of GSH-AuNCs under 450 W Xe lamp irradiation for different time (time interval: 10 min).

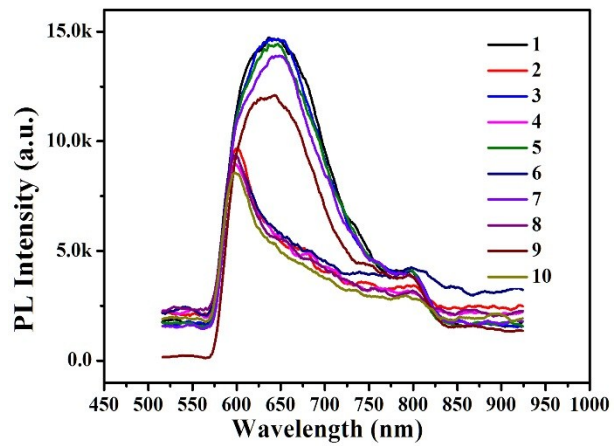

**Fig. S7.** Fluorescence spectra of the aqueous solution of GSH-AuNCs during five heat-up and cool-down cycles.



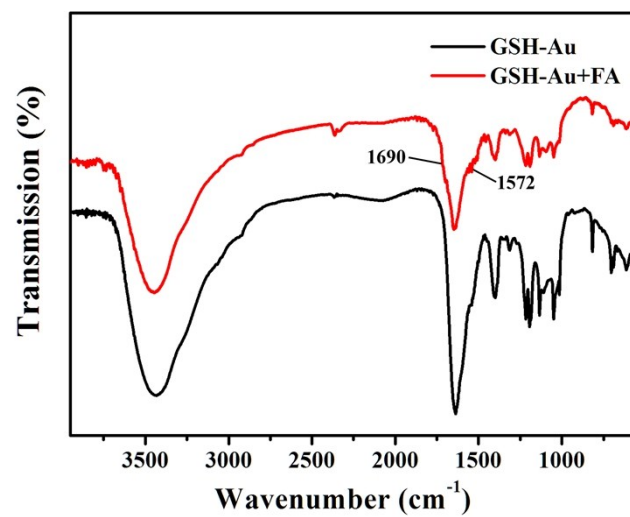

**Fig. S8.** FTIR spectra of GSH–AuNCs and FA-conjugated GSH–AuNCs.

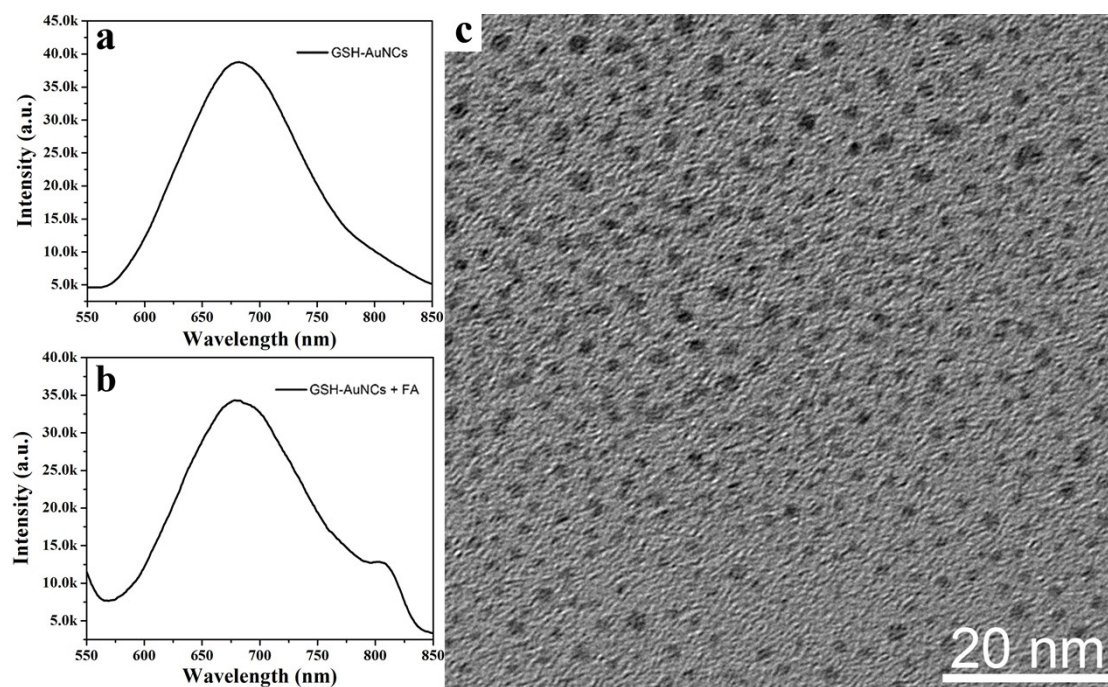

**Fig. S9.** The fluorescent spectra of (a) AuNCs and (b) FA-conjugated GSH-AuNCs; c, TEM image of FA-conjugated GSH-AuNCs.

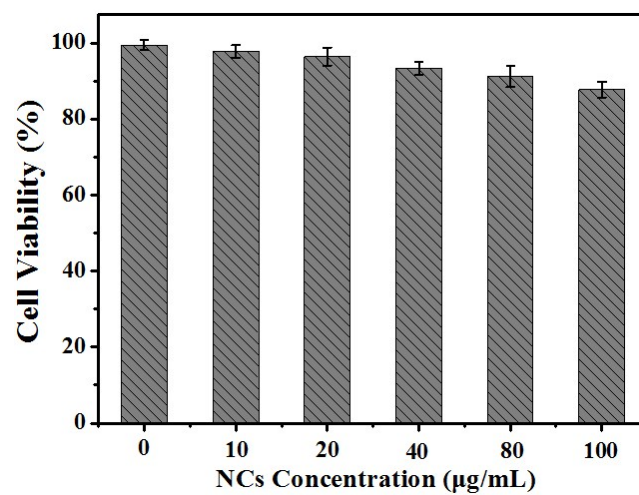

**Fig. S10.** Viability of HeLa cells after incubation with different concentrations of FA-conjugated GSH-AuNCs for 24 h in the cell medium as determined by a MTT assay.

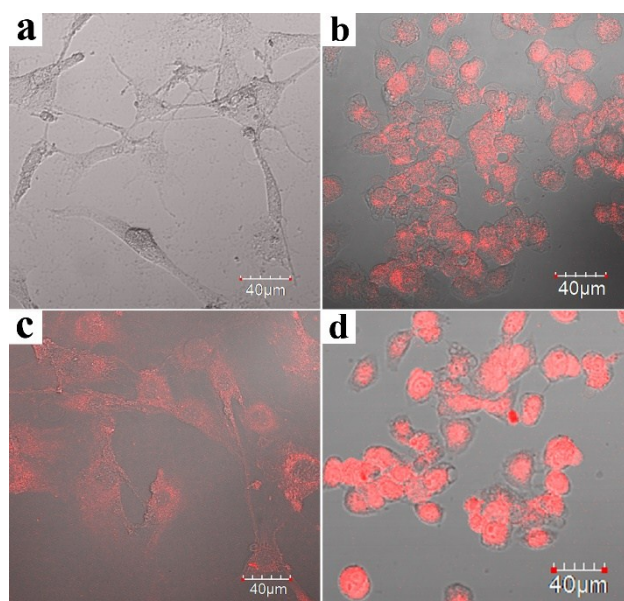

**Fig. S11.** Fluorescence imaging showing the delivery of GSH–AuNCs with NIR fluorescence into the (a, c) 3T3 cells and (b, d) HeLa cells; the concentration of GSH–AuNCs is 20 μg/mL and the incubation time is (a, b) 4 h and (c, d) 12 h.
